# Supplementary material for: Upregulation of Prickle2 Ameliorates Alzheimer’s Disease-Like Pathology in a Transgenic Mouse Model of Alzheimer’s Disease
Source: PubMed Central journal article supplement (PMC7509431; doi:10.3389/fcell.2020.565020), 2020-09-08
Supplement: Image_1.pdf [file Image_1.pdf]

## Supplementary materials

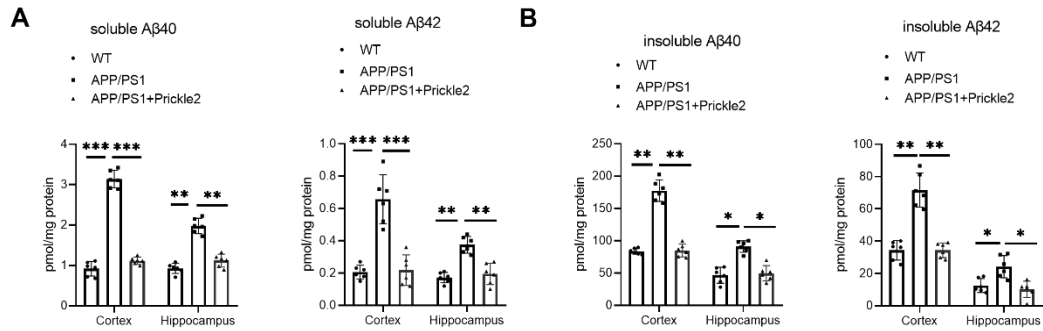

**Fig. S1.** ELISA assay was performed to measure the soluble and insoluble A $\beta$ s. (A) Soluble A $\beta$ s and (B) Insoluble A $\beta$ s were detected using ELISA (n = 6 per group). ANOVA followed by Bonferroni's post hoc test. \*p < 0.05; \*\*p < 0.01; \*\*\*p < 0.001; \*\*\*\*p < 0.0001.
